# Supplementary material for: Effect of the 2022 summer drought across forest types in Europe
Source: Copernicus journal article supplement (doi:10.5194/egusphere-2024-423), 2024-02-26

**Supplementary Material**  
**Effect of the 2022 summer drought across forest types in Europe**

**Supplementary Figure 1** Relationship between SIF and NIRv anomalies during 2003, 2018, and 2022 for different forest types.

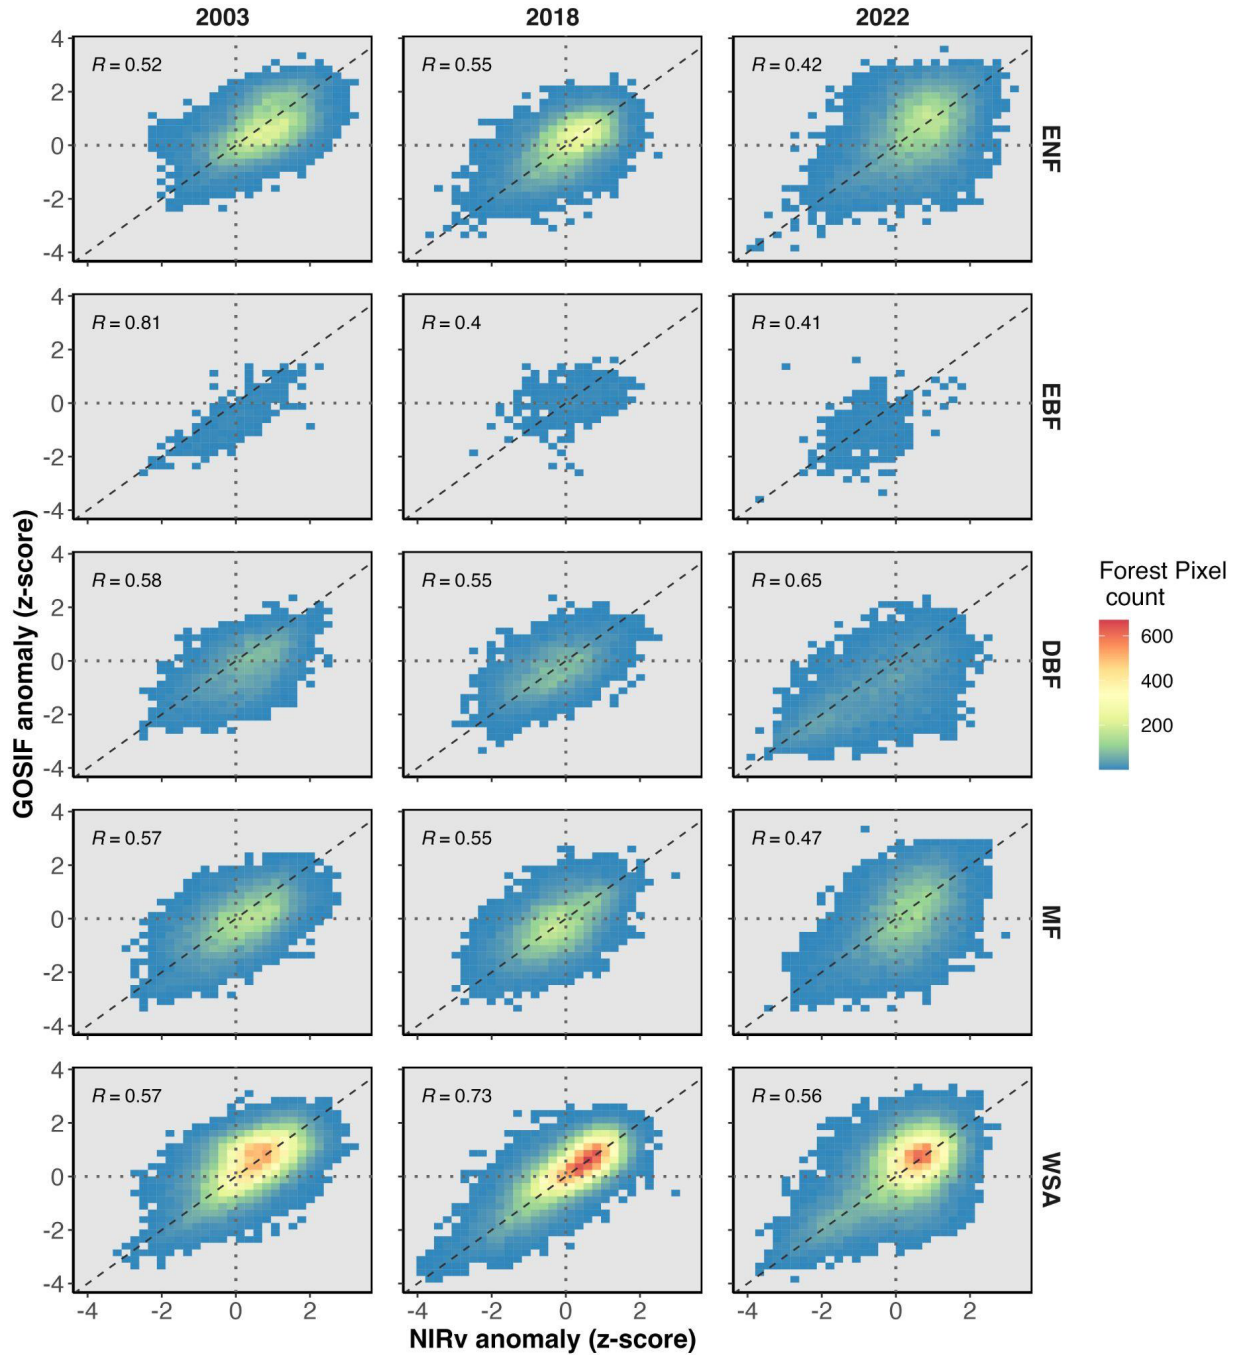

**Supplementary Figure 2** Temporal partial correlation coefficient of NIRv with SM and VPD during summer for detected (a) drought areas and (b) normal areas.

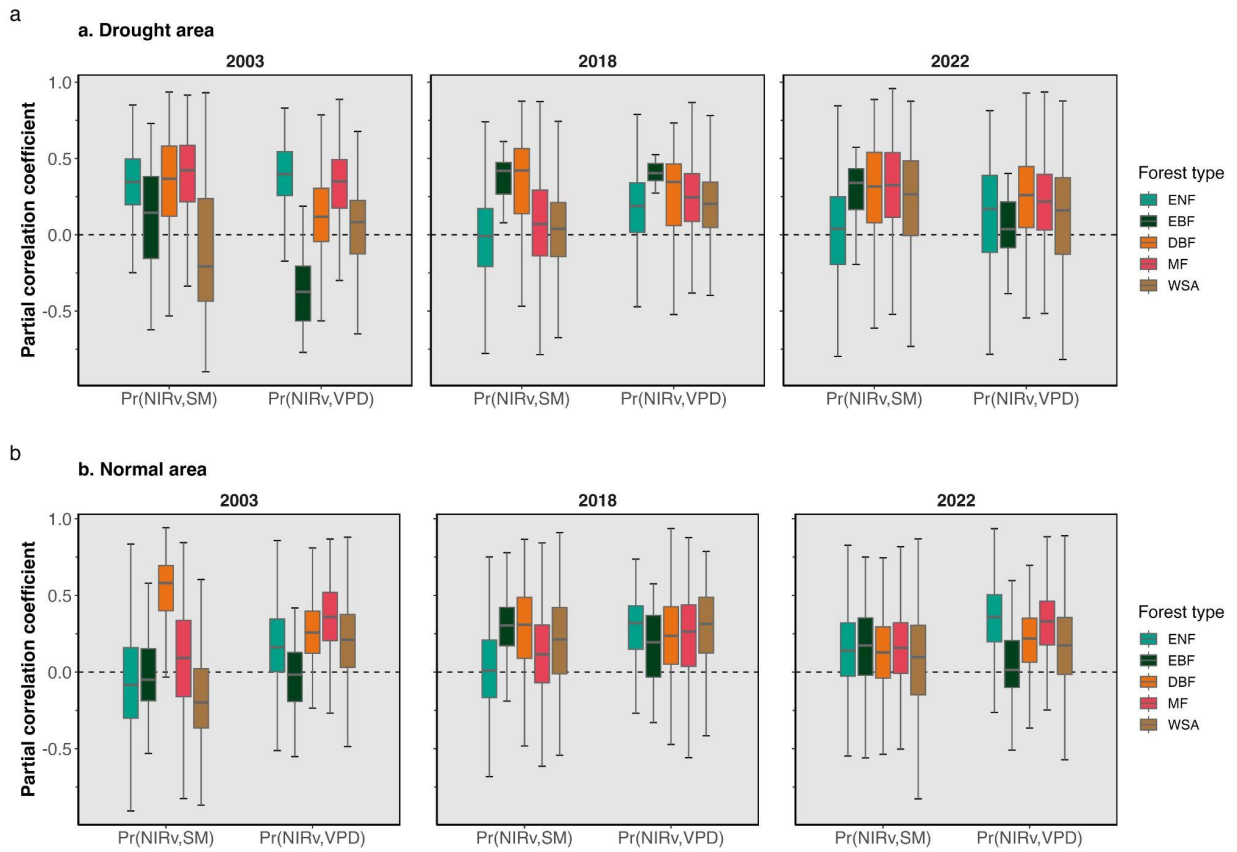

Supplement: Supplementary file 1 [file egusphere-2024-423-supplement.pdf]
