# Supplementary material for: Effect of the 2022 summer drought across forest types in Europe
Source: Copernicus journal article supplement (doi:10.5194/egusphere-2024-423), 2024-02-26
Supplement: Supplementary file [file egusphere-2024-423-AC2-supplement.pdf]

## Discussion of “Effect of the 2022 summer drought across forest types in Europe”

Gharun et al.

Reviewers' comments are in italic. The Authors' responses are marked in blue.

### Author Response to Referee 2

*The paper analyzes the relationship between two climate variables relating to drought (soil moisture & VPD) and the productivity of forests as measured by the proxies NIRv & SIF, quantifying the severity of drought and the productivity reaction through the z-score. A visual comparison is provided between different drought periods in terms of the z-score of the productivity metrics and the z-score of the meteorological metrics. The relationship of these responses is then related to individual forest types and the response strength compared in terms of partial correlations.*

*The paper addresses some relevant scientific questions in terms of the scale and impacts of a specific recent drought and poses questions about why there may be a different response compared to two previous droughts. It is good that it uses multiple novel metrics of vegetation productivity in both NIRv and SIF. It is relevant to the current special edition and has some novelty, in that it analyses the impact of the 2022 heatwave on vegetation. However, in its current form it needs a lot more detail and clarity to support some of its conclusions. A deeper explanation of the analysis and some statistical clarifications, alongside extra supporting analysis to support the results (such as further drought indicators and more than just the 0-7cm of topsoil), perhaps reconsidering which areas considered in the analysis are actually drought affected. A thorough proofreading before re-submission is important. A toning-down of some of the findings/conclusions is also required and would be helped by a wider consideration of what may be contributing to the observations.*

#### Response:

Thank you for your thorough feedback. We will improve the clarity of the paper and provide a deeper explanation of the analysis, together with additional analysis to support our results. We will also tone down some of the conclusions to avoid overextending the implications of our findings. The following is our response to each specific comment.

#### Specific comments

##### *Clearer introduction and explanation of the figures*

*The paper would benefit from a clearer explanation of some of the figures, and a separation between sentences explaining/defining what the figures are and sentences describing the results in the figures. Clearer captions would also help this: figure captions should be standalone, i.e., descriptive enough to be understood without having to refer to the main text. A good positive example is figure 2 which describes clearly what the content is with a clear line introducing the figure by description, before later describing the results.*

L215 : *'Figure 2 shows the extent and magnitude of anomalies (z-score) of VPD and top layer (0-7 cm) soil moisture content during the summer months in 2003, 2018, and 2022 across the entire region of Europe.'* The caption is also reasonably descriptive. However, in figure 3 there is no similar sentence introducing the figure. Instead it is referenced in brackets without explanation/description:

Response:

We will add clarification to the text as follows: "Figure 3 shows the intensity of atmospheric and soil drought via z-score values of VPD and SM anomalies over the summer months (JJA) in 2003, 2018, and 2022.

L226: *'Restricted to forested areas, atmospheric and soil drought was 55% and 58% more extensive in 2018 compared to 2022 (and both years more extensive than in 2003, Figure 3).'* This doesn't give us information on important facts of the figure: Are these the z-scores for the entire JJA period (like in the previous figure – compared to the previous JJA periods) or is it for 8-day periods? I would assume the former, but then the NIRv and SIF is described only in terms of 8-day, so it's not clear if it has been averaged or aggregated. Is the forest area affect the total summation of all pixels with the given binning of z-score during that summer period? Is the z-score the average for the full JJA for each pixel? All this useful information is missing, and even more could be added to help the reader understand.

Response:

Here we will also add "The total affected area displayed in Figure 3 is the sum of all pixels within the given z-score bin during the summer period where z-scores are averaged for each bin for the summer period."

*The same is true for figure 4, figure 5, figure 6, 7, 8, & 9. It would be nice to have a specific reference to each of them in the text describing first what we are seeing (i.e. what is the figure of) before describing the results (i.e. what does it tell us). Particularly as we are missing information on the time periods described (8-day or summer) and – especially for 7/8 - whether we are mixing space and time pixels (i.e. is each point a particular pixel in space and a particular time period – this is very important for the interpretation).*

Response:

We will add more information about the figures to the text and describe them first.

For Figure 4 we will add: "The intensity of GOSIF and NIRv anomalies over the summer months (JJA) in 2003, 2018, and 2022 are displayed in Figure 4. The extent shown in Figure 4 is the sum of all pixels within the given z-score bin during the summer period (z-scores are averaged for each bin)."

For Figure 5 we will add: "Figure 5a shows the GOSIF anomalies (z-score) across all forested areas in Europe. The intensity and extent of the GOSIF anomalies during the summer months (JJA) in each year are shown for different forest types in Figure 5b."

For Figure 6 we will add: "Figure 6a shows the anomalies of NIRv (average z-score over the summer months) across all forested areas in Europe. The intensity and extent of the NIRv

anomalies during the summer months (JJA) in each year are shown for different forest types in Figure 6b.

For Figure 7 and 8 we will add: “Figure 7 shows the spatial regression between standardized SIF anomalies with (a) VPD and (b) SM and Figure 8 shows the spatial regression between standardized NIRv anomalies with (a) VPD and (b) SM over the drought areas in summers 2003, 2018 and 2022.”

For Figure 9 we will add: “Figure 9 shows the temporal partial correlation coefficient of GOSIF with SM and VPD during summer months (JJA) for areas identified as affected (Figure 9a) and not affected (Figure 9b) by drought.”

In addition we added to all figure captions that the z-scores are derived for the summer months (JJA).

*For Figure 7:*

*L273: ‘With the increase in VPD positive anomalies (i.e., increased atmospheric dryness), SIF values declined across all forest types, across all years, except in 2022 in the WSA, and in 2018 and 2022 in EBFs (Figure 7).’ However, the caption of figure 7 does not mention any VPD anomalies (it seems to have the actual VPD and SM – with units). So which is it? Also what are each of the points? Are they individual pixels? And if so are they at 8-day values or JJA?*

**Response:**

We will correct the statement and write instead: “With the increase in VPD (i.e., increased atmospheric dryness) GOSIF values declined across all forest types, across all years, except in 2022 in the WSA, and in 2018 and 2022 in EBFs”.

We will clarify in the caption of Figure 7 that each of the points are the values for JJA.

*Similarly for figure 9: L292 ‘The SM and VPD anomalies across all forest types correlated well, but across DBFs the dryness in the atmosphere and the dryness in the soil were most correlated (Figure 9).’ In this description we are talking about SM and VPD anomalies, but in the caption, there is no mention of the anomalies. So are we talking about anomalies or not?*

**Response:**

The temporal partial correlations shown in Figure 9 are between the absolute values and not anomalies. We will correct this statement and write: “The SM and VPD values across all forest types correlated well, but across DBFs the dryness in the atmosphere and the dryness in the soil were most correlated (Figure 9).”

*The paper needs more precise language and a clear explanation of where the data in the figures comes from and what the figure contains. This should be separate from trying to describe the patterns. As it stands it can be confusing and a struggle to read, and therefore difficult to understand and judge the scientific content as well as difficult to reproduce (especially as code and data is not released). I expand on this in the minor comments, but it isn’t fully clear*

*what is being done in some of the figures. A slower more explicit explanation of each figure is necessary, including more information in both the text and the caption.*

**Response:**

We will follow the reviewer's recommendation and clarify the explanation of the data and what each figure contains. We will add a more explicit explanation of each figure in the text and in the figure captions.

*Clarification of the SIF data used*

*The paper would benefit from more discussion of both what SIF actually is and the SIF product used, including how it was developed. Indeed there is not much explanation of how the SIF signal originates and therefore why it might be affected by drought, other than SIF is a proxy for photosynthesis and 'provides information about the physiological response of forest photosynthesis' (a more complete description of SIF in the introduction would be nice).*

**Response:**

We will add a section in both the Methods and Discussion sections of the revised version of the manuscript and explain the SIF product that we have used and its implication on our results.

*It also isn't made clear exactly what SIF product is being used. In the abstract they say that 'the OCO-2 solar induced fluorescence' dataset, whilst reading deeper it appears it is the GOSIF product (indeed on figure 5, the label GOSIF is on the x-axis, a label which is not introduced/explained anywhere else in the text). If it is the GOSIF dataset, which it appears from the reference Li, X., Xiao, J. (2019), this should be explained more clearly and there should be some discussion of its derivation and its limitations.*

**Response:**

As responded to your query above, we will 1) clarify in the Methods section what SIF is, 2) clarify what product we have used (GOSIF product) and explain its reconstruction process, and 3) replace "SIF" with "GOSIF" everywhere throughout the paper where the focus is the product that we have used, in the revised version of the manuscript.

*This is important because the reader is given the impression that 'SIF was available 2000-2022 at 8-day temporal scale with spatial resolution of 0.05x0.05' from the 'OCO-2 SIF dataset', when in reality no satellite dataset exists. OCO-2 was only launched in 2014 and has discontinuous spatial coverage. GOSIF is a product derived from OCO-2 data and combined with remote sensing data from MODIS, and meteorological reanalysis, using a data-driven approach to predict the SIF in the earlier years. The paper should make this distinction clear. Whilst it is mentioned in the methods 'we used two satellite-based proxies: 1) ... 2) the physiological-based reconstructed global OCO-2 solar induced fluorescence (SIF). ' the word 'reconstructed' really skips over details which are highly relevant to the paper results. As one of the main conclusions of the paper is that there is a difference in the SIF response between 2003 and 2022, and that*

*the difference is due to meteorological drivers, it is important to note that the SIF signal in 2003 is a modelled/predicted signal, modelled/predicted based on those same meteorological drivers, whilst the SIF response in 2022 is a measured OCO-2 signal (although also somewhat modelled due to gap filling). Therefore there should be some discussion of this limitation of the study – we are not comparing like with like, and the modelling may have a confounding effect (i.e. we are looking at the impact of our ‘independent variable’ meteorology on our ‘observed variable’, SIF, but our independent variable is also used to predict our ‘observed’ variable, so our ‘independent’ variables are not really independent of SIF). I don’t think this is enough to cause a fundamental problem for the results, but it deserves discussion.*

**Response:**

In fact, SIF in both 2003 and 2022 was modeled using the predictive SIF that we trained with original, OCO-2 SIF soundings, EVI, and meteorological data. So we are actually comparing like with like. We will briefly discuss the confounding effect the reviewer pointed out in the discussion as follows: "It should be noted that the SIF data used in this study (i.e., GOSIF) are estimated using a machine learning model that was trained with OCO-2 SIF observations, MODIS EVI data, and meteorological reanalysis data. Therefore, the meteorological data that is used in our analyses are not completely independent of our SIF data. However, this is not likely to affect our findings. A recent study used both GOSIF and original OCO-2 data to examine the impacts of the 2018 U.S. drought on ecosystem productivity and found that SIF based on these two datasets had similar responses to drought (see Li et al. 2020)."

*What is a drought and what is considered stress*

*One problem with the paper is the definition of what is a drought . The word drought is used extensively in the publication, including in the title, as well as being specifically defined in the paper, and referenced throughout the paper. My understanding is that there are a few ways meteorologists and vegetation specialists may define it, such as:*

1) ‘A drought is a period of unusually persistent dry weather that continues long enough to cause serious problems such as crop damage and/or water supply shortages... low precipitation over an extended period of time’ NASA <https://gpm.nasa.gov/resources/faq/what-drought-and-what-causes-it>

2) drought is defined as a deficiency of precipitation over an extended period of time (usually a season or more), resulting in a water shortage NOAA <https://www.drought.gov/what-is-drought/drought-basics>

3) “A period of abnormally dry weather sufficiently long enough to cause a serious hydrological imbalance.” American Meteorological Society

4) regarding specifically the 2022 drought: <https://climate.copernicus.eu/esotc/2022/drought> it was not just hot/dry conditions during the summer, ‘A persistent lack of precipitation was observed from winter 2021/22 onwards and, for the year as a whole, surface soil moisture was

*the second lowest in the last 50 years. Higher-than-average temperatures and a sequence of heatwaves that started in spring and continued throughout summer sustained and enhanced drier-than-average conditions.'*

*Whilst there is no specific quantifiable criteria to define a drought (it is an area subject to debate), it is clear that it relates to persistent dry conditions enough to have a serious impact. As there is this open discussion on what defines a drought, publications about drought (as opposed to say – water stress), might often use a couple of different metrics.*

*In the paper, drought is defined as*

*'Areas were categorized as under drought if  $VPDz > 1$  &  $SMz < -1$ , and as normal areas if  $-1 < VPDz < 1$  &  $-1 < SMz < 1$ .'*

*i.e. based on 1sigma deviations of Vapour pressure deficit and soil moisture (calculated across the JJA summer period from 8-day SM&VPD data in the 0-7cm layer) from their long-term means. There is no reference given to literature to support this definition of drought. Is there some literature to support this? At the least, the paper would benefit from a larger discussion on this open question of what defines a drought and why this definition is appropriate.*

**Response:**

We fully agree with the reviewer that the word drought is used extensively in publications and sometimes it is even not specifically defined in ecological studies (see a review of this issue by Slette et al. 2019). We agree that it is important to have a clear definition of conditions that are extremely dry, based on indicators that are ecologically relevant. As the reviewer also mentions, we have defined drought as persistent dry conditions enough to have a serious impact on the ecosystem. Regarding the choice of the variables, we know from the body of literature that both SM and VPD directly influence vegetation functioning and thus are suitable proxies for identifying environmental limitations to plant physiological functioning.

Regarding the definition and identification of drought: we have defined drought as conditions of when the soil moisture and VPD are below normal and above normal respectively, i.e., presence of soil and atmospheric dryness. In drought identification studies, classification of 'normal' (not to be confused with normal distribution), 'drought' (used synonymously with 'dry'), or 'wet', is largely done using a standardized index, such as SPI (Standardized Precipitation Index), SPEI (Standardized Precipitation Evapotranspiration Index), Z-score among others, as highlighted in the review 'A review of drought concepts' by Mishra and Singh (2011). All studies that use a standardized index for classification, classify "normal" conditions when the index is between -1 and 1, and "drought" conditions when the index is  $< -1$ , and "wet" conditions when the index  $> 1$  (see Table 2 of Jain et al. (2015), Table 4 of Wable et al. (2019), Table 2 of Dogan et al. (2012), Table 1 of Tsakiris and Vangelis (2004)). In this study, we classify drought conditions using standardized metrics for soil moisture (SM) and vapor pressure deficit (VPD), specifically their z-scores. This approach aligns with established drought identification methods in the literature. Such classification of 'normal' (and thus, 'above normal' and 'below normal' used in this study) based on z-score (also called standardized anomalies) can be done for any

meteorological and/or response variables (such as NIRv and GOSIF done in this study), making the narration of results coherent across different variables (as done in this study). In the revised manuscript, we will incorporate the above-mentioned explanation into the Methods section to clarify our drought definition and identification approach.

*It is not entirely clear to me if some of the figures are showing 8-day VPD and SM in the data, or if the JJA anomaly is the only one used. If it is only the JJA anomaly used then I think it might just fit the description of 'extensive/persistent' (though it would be important to add more of a discussion including literature on what defines a drought and the fact that period preceding the summer may play a role). However if some of the figures are showing the 8-day anomaly of SM and VPD then I'm not sure we can use the word drought over such a short time period (sure it might be a period of low VPD or soil moisture during a drought, but the fluctuation itself is not defining a drought).*

Response:

The JJA anomaly is used. We will clarify this throughout the text.

*Whilst these VPD/SM fluctuations do of course relate to drought, drought is an extensive and meaningful extreme climate event, and. I'm not sure if many people would define a 1s.d. downward fluctuation in VPD and SM in the topsoil layer as 'under drought'. Particularly if we are looking at the 8-day VPD and SM (which is not 'an extended' or 'persistent' period of time in the growing season of a tree. Trees have roots that go far beyond the first 7cm (<https://bg.copernicus.org/articles/17/5787/2020/>), and so a slightly dry period affecting the top layer might not be enough to cause damage or significant browning. Forests are generally sufficiently adapted to tolerate (1sd) temporary fluctuations in soil moisture and air dryness.*

*Alternatively, if we are taking the 2003, 2018, 2022 summers as established droughts (given in the literature), and then within these drought categories we are looking at further water stress variability within the drought affected region, then we could drop the definition of drought and keep the analysis (i.e. we are using a definition of drought defined by other literature sources). However it wouldn't make so much sense in that case to include areas that are not part of the drought affected regions (e.g. Spain in 2018, or Northern Europe in 2022). Personally I would define  $< -1$  s.d. SM and  $> 1$  s.d. VPD as under a some water stress. With  $> 2/2.5/3$  s.d. perhaps we can maybe start thinking about a more major (or 'significant') water stress and drought (if persistent) – this is similar to definitions here: <https://www.science.org/doi/10.1126/sciadv.aba2724#sec-5> .*

Response:

The years that we have selected were generally identified as extreme years as unprecedented conditions of high air temperature and low precipitation levels were recorded across many regions in Europe. For our analysis it was necessary to provide a clear definition of the conditions we consider stressful for the vegetation in terms of limiting water availability in the soil and in the atmosphere, and apply the same definition for all regions (regardless if the trees in a certain region have the mechanisms to cope better with the drier conditions). Without a

clear metric it would be subjective to keep certain regions out from the analysis. We chose a “relative” metric (as opposed to a fixed threshold) and assessed water availability in all regions relative to the conditions of that particular region.

Regarding the definition for a major (or “significant”) stress, we do have this classification at the higher z-score levels. The  $-1 < z\text{-score} < 1$  range specified the “normal” conditions and outside this we have different degrees of water stress depending on the high z-scores. Please see our response to your previous query, for more clarification.

*Including layers beyond the 0-7cm range would benefit the analysis as deeper droughts are more stressful to the vegetation with deep roots (see <https://nhess.copernicus.org/articles/23/1921/2023/> where 1m soil is considered or <https://royalsocietypublishing.org/doi/10.1098/rstb.2019.0507> where 2.89m soil is considered).*

Response:

Yes, we agree that drought in the deeper soil layers is more stressful to the vegetation that have a deeper root system. However, based on our previous experience, drought propagates similarly across different depth (see Figure 4 of Lal et al., 2023). Therefore, we assumed that the drought area detected using the 0-7cm SM data will be similar to the drought area detected based on 0-100cm SM data. In the revised version we will test if the drought area differs significantly when 0-7 cm and 0-100 cm SM data is used. If we find significant differences, then we will extend our soil moisture data to 0-100cm depth for detection of drought areas and update the results based on that.

*If we are looking at 8-day VPD and SM anomalies (I don't think we are, but I say just in case, as it is not clear), however, then we are not really fitting the definition of a 'persistent' time period. In order to use the word drought, and compare the extremity of droughts, I think it would be necessary to use a specific drought index, such as Palmer Drought Severity Index (PDSI) (Palmer, 1965), Standardised Precipitation Index (SPI; McKee et al., 1993), and maybe better SPEI <https://spei.csic.es/>. I think this would benefit the analysis even if we are not considering the 8-day anomalies. Such a predefined index could be used in conjunction with the current work and fits nicely as another metric showing water stress relative to the average. It would satisfy the requirement of a persistent time period (as the analysis could consider both 3-month and 6-month periods). It would hopefully not require too much extra work (the downloading of precipitation – already present it seems - and evapotranspiration datasets and calculation of the index values using one of many available packages) or many more figures (a third panel for fig3 fig7 and fig8).*

Response:

No, we are not looking at the 8-day VPD and SM anomalies. We are looking at the average anomalies for the summer months (JJA). Water availability (or the lack of it) can be identified with three methods: 1) fixed thresholds (e.g., of precipitation amount, soil water potential, etc.) 2) relative thresholds (e.g., z-score and anomaly of climate drivers) and 3) drought metrics. We chose the second approach and quantified a relative threshold, and applied it to atmospheric and soil moisture data since we believe that VPD and SM incorporate the feedback from the



vegetation to the climate conditions (mediated for example by the actual evapotranspiration) whereas a drought index such as SPEI reflects only the potential for evapotranspiration and not the feedback from the vegetation.

#### *The area of drought considered*

*Additionally, it seems we are considering the same time period JJA and the full extent of Europe for each of these 'droughts'. But the heatwaves are not directly comparable because there are different areas of focus of the drought in each separate drought event, and the droughts lasted different time spans. So in the end we aren't really comparing similar data between years – we are making large spatial and temporal averages (different European summers) and applying them to specific spatially and temporally constrained events (heatwaves). In particular it seems we are including non-drought pixels (e.g. Spain/Italy in 2018) in the comparison of between the different drought years and so drawing conclusions based also on the reaction of non-drought areas. This is most clear in the following example: Scandinavia was not really affected by the 2022 heatwave as your figure shows (as well as <https://www.ecmwf.int/en/about/media-centre/news/2022/european-heatwaves-june-2022> ) yet this region is included in the analysis. One of the conclusions is: 354: 'While deciduous broad-leaved forests were most negatively affected by the extreme conditions in 2022, Evergreen Needle-Leaf Forests (ENF) distributed in northern regions of Europe showed enhanced canopy greening and SIF signals, through benefiting from the episodic warming.'*

*Which is explained with an extensive discussion on physiology:*

*L358: 'The mechanisms to cope with the level of drought stress, vary largely among forest types, and depend on a combination of characteristics that control water loss through the coordination of stomatal regulation, hydraulic architecture, and root characteristics...'*

*Another, simpler, way to interpret this would be that ENF is mostly present in Scandinavia. Scandinavia was not really affected by the 2022 heatwave. Therefore Europe's ENF forests were not really affected by the heatwave. Is this mechanism accounted for in the analysis? I don't think it is wrong to say L358, however I'm not sure the methodology of the paper is sufficient to support the conclusion that the difference in response was due to physiology, as opposed to a given region just not being involved in that particular heatwave. This conclusion of the paper may risk suggesting that ENF forests are more drought safe than other forests – which is probably not being demonstrated in the analysis.*

#### **Response:**

We agree that our wording here implies a wrong interpretation. We will change this statement in the revised manuscript and write instead:

“While deciduous broad leaved forests were negatively affected by the extreme conditions in 2022, Evergreen Needle-Leaf Forests (ENF) distributed in northern regions of Europe were not exposed to extremely dry conditions in 2022 and even showed enhanced canopy greening and GOSIF signals, through benefiting from the episodic warming (Forzieri et al. 2022). Under similar drought conditions, the mechanisms to cope with the level of drought stress vary largely among forest types,..”

## Legacy effect

*Another key conclusion drawn is that the 'higher degree of canopy damage in 2022' suggests 'declining resilience of forests to drought' and 'points to a legacy effect'. However by combining different spatial areas and mixing different forests I'm not sure we are really testing a 'legacy effect'. To test a legacy effect or declining resilience we should really control for the impact of droughts on the same forest areas across compounding years and observe if similar sized perturbations cause worsening compounding effects. Taking Europe-wide spatio-temporal averages of vegetation response (across various distributed forest types) between two very different averaged periods of 'drought' (i.e. 1sd fluctuation in 0-7cm topsoil water and VPD) and saying that the second period was more severe despite lower 'drought', because of a legacy effect and therefore shows a decline in resilience is a very strong conclusion from a very broad methodology. Assuming I have understood the methodology correctly for this conclusion – feel free to point out if I have missed something. Additionally, it seems clear that the 2022 drought, whilst perhaps less extreme during the summer in question was coupled with a winter drought over a prolonged period. Described here: '<https://climate.copernicus.eu/esotc/2022/drought> 'A persistent lack of precipitation was observed from winter 2021/22 onwards and, for the year as a whole, surface soil moisture was the second lowest in the last 50 years. Higher-than-average temperatures and a sequence of heatwaves that started in spring and continued throughout summer sustained and enhanced drier-than-average conditions.'*

*Additionally the preconditions of the 2018 drought (spring/winter) were less extreme: <https://www.science.org/doi/10.1126/sciadv.aba2724> How do we know from the analysis that the 'higher degree of damage in 2022' compared to 2018 was not due to a prolonged drought in 2022 beyond the period considered (ie winter), even if there was slightly more water available during the summer months?*

*Potentially this can be solved by toning down the language and not implying that the analysis demonstrates such large claims. Some additional discussion of other factors not considered in the analysis would also be beneficial. Ideally however, a more thorough analysis would be done that takes into account a wider range of factors, including the preceding time period, and compares responses between similarly impacted areas of similar vegetation controlling for other explanations of the dynamics.*

## Response:

*We see the point of the reviewer that here we cannot draw a conclusion regarding the legacy effect. We will tone down our interpretation and remove this conclusion throughout the text.*

## Statistical language and methodology used

*There is sometimes inaccurate, confusing or misleading use of statistical language. For example: L192 'Z-scores less than -1 and more than 1 indicate significant negative and significant positive anomalies beyond normal variability.'*

*L238 & elsewhere: 'Z-score, values from -1 and 1 are considered normal (within 1 standard deviation of the mean)'*

- actually, in a normal distribution (which I think is what we assume here) z-scores of any value are all within the range of normal variability and are by definition 'normal' (this is why it is called the normal distribution. We might sometimes observe an excess of events compared to normal variability, or we might chose to define 'discovery' or a particular feature (e.g. a drought) at a particular statistical level, but these might still be normally distributed. The word 'significant' also has a particular statistical meaning and is normally considered  $p=5\%$  or so, i.e. 2.5 sigma for a normal distribution, but is dependent on the level of precision required for an experiment. In particular, variations beyond a single standard deviation are not particularly significant, they should occur 32% of the time in a normal distribution of results. As the section is 'statistical data analysis' it is important using precise statistical language for the work. Similarly, L230 'extremely low soil moisture content (z-score < -1)' L233 'was affected by extremely dry air and a similar area was affected by extremely dry soil' again to me extreme implies something a lot less than 1s.d. away (15% of all events if looking at just the lower shoulder). I would call around 1s.d. a fluctuation. I think this also relates a lot to the other specific comment on how we are defining a drought within the paper. There are several uses throughout the paper of wording that is statistically meaningful, but used in an incorrect way (see minor comments). This results in some confusion and doubt on the strength of the conclusions and results. Overall, greater care and understanding should to be taken in dealing with statistical concepts.

Response:

We define non-drought conditions as normal (see our response to your previous query please). When we mention normal throughout the paper we are not talking about distribution types. We cannot use the term non-drought because we are using a relative matrix that is not only about normal/non-normal moisture conditions, but also determines normal/non-normal vegetation properties (based on GOSIF or NIRv). Thus we would like to remain with the definition of "normal" condition as we have specified in the paper. We will correct all other cases where statistical terms are confusing. See our response to the specific comments please.

*Additionally some clarity of the statistical treatment of results would be helpful. My understanding of figures 7/8 is that we see a regression of all spatial pixels from 3 different drought periods (2003, 2018, 2022). I think, but it is not clear, that each point is a pixel as well as potentially an 8-day period (or a single JJA mean anomaly or mean JJA value?). If it is mixing both space and time, then I think we get into questions of spatial autocorrelation, and whether the strength of the relationship is being artificially boosted by this mixing. To understand this, the figure would benefit from an explicit and detailed explanation of what it is showing. If it is all pixels but showing the JJA average (anomaly or real value, also unclear, see specific figures comment) then perhaps it is ok as a spatial regression only.*

Response:

Thank you for the query. For Figure 7, each point represents a single JJA anomaly of GOSIF against VPD or SM for each drought pixel, thus it gives an idea of how the spatial differences in GOSIF anomalies are related to VPD or SM. For Figure 8, the boxplot is also derived for each

pixel's partial correlation of SM, VPD and GOSIF for JJA period (so based on 8-day data) of each 2003, 2018, and 2022, i.e., it gives an idea about how the temporal (within each summer year) variation of GOSIF relates to VPD and SM. We will modify our statements and clarify our results better in the revised version of the manuscript.

*Additionally see the minor comments for some examples of dubious statistical practices.*

*Technical comments: L23 we used the ERA5-Land spatial meteorological dataset between 1970 to 2022 to identify conditions with extreme soil and atmospheric dryness. In the methods it says:*

*L114 'We used Europe-wide (Longitude: 11°W - 32°E; Latitude: 35.8°N -72°N, approximate area of 4.45 million km<sup>2</sup>) gridded datasets of daily total precipitation (Precip; mm), daily mean air temperature (Tair; °C), daily mean relative humidity (RH; %) and daily mean soil moisture (SM; m<sub>3m-3</sub>) of topsoil layer (0-7 cm depth), spanning from 2000-2022.'*

*L118: 'Precip, Tair and RH datasets from the E-OBS v27.0e dataset'*

*Which is it out of 1970-2022 and 2000-2022? And why do you say ERA5-Land only when elsewhere it says E-OBS?*

**Response:**

The dataset of Precip, Tair, and RH (subsequently used to calculate VPD) from EOBS v27.0e and soil moisture from ERA5-Land spanning from 2000-2022 were used in this study. We will correct the abstract in the revised version.

*L25: and the OCO-2 solar induced fluorescence (SIF) as an observational proxy*

*See specific comment on SIF*

**Response:**

We will correct this in the revised version of the manuscript.

*L35: Across different forest types, the deciduous broad-leaved forests were most negatively affected by the extreme conditions in 2022, but Evergreen Needle-Leaf Forests (ENF) distributed in northern regions of Europe showed enhanced canopy greening and SIF signals as a benefit of warming.*

*Perhaps it is not just a benefit of the warming – from figure 2 it appears that they weren't part of the drought area at all. They exhibit a positive SM anomaly and minimal negative VPD anomaly. This begs the question – are they actually areas of drought? And should they be included as data points in the discussion of the drought impacts?*

**Response:**

We will rewrite this statement to: "Across different forest types, the deciduous broad-leaved forests were most negatively affected by the extreme conditions in 2022 given the extent and severity of drought within the distribution range of these forests. The areas dominated by Evergreen Needle-Leaf Forests (ENF) distributed in northern regions of Europe however

experienced a positive SM anomaly and minimal negative VPD in 2022 and the forests showed enhanced canopy greening and SIF signals as a benefit of warming.”

*L38: 'Higher degree of canopy damage in 2022 in spite of less extreme conditions compared to the previous extreme year points to a legacy effect on forest canopies, and a declined forest resilience in response to more frequent drought events.'*

*Whilst the result is interesting to point out and relevant, I don't think the level of analysis is able to say that it 'points to a legacy effect' or 'a declined forest resilience'. I think it can be mentioned as needing further study in the discussion section, with hypothetical wording such as 'could be due to legacy effects' but, such a strong wording would require further investigation (for example comparing the difference in responses between comparable forests affected by the 2022 drought but not by the 2018 drought, and testing for other factors such as lower forest health prior to the summer). See specific comment.*

Response:

We have addressed this point in response to a previous query..

*L60 threshold → thresholds*

Response:

Will be corrected.

*L71 The hardest-hit areas were Iberian Peninsula  
'the Iberian Peninsula'*

Response:

Will be corrected.

*L115 'gridded datasets of daily total precipitation (Precip; mm)*

*Is precipitation data used in the analysis? As far as I can tell only SM and VPD (calculated via RH and Tair) are used.*

Response:

Will be corrected (we did not use the precipitation data).

*L117 and daily mean soil moisture (SM; m3m-3) of topsoil layer (0-7 cm depth),*

*When we are talking specifically about the impact of drought on forests (rather than say e.g. water stress/perturbation), I'm not sure the topsoil alone is sufficient to quantify the magnitude and the response.*

Response:

This point is addressed in response to the previous query..

*L121: ECMWF... new land component... ERA5 dataset.*

*As the paper is depends on heatwaves and weather extremes as measured by ERA5, it is worth mentioning somewhere (here or in the discussion) that ERA5 has some limitations specifically when it comes to modelling extreme events such as heatwaves – it tends to underestimate the extent, due to non-dynamic LAI (<https://gmd.copernicus.org/articles/16/7357/2023/gmd-16-7357-2023.html> ). I don't think there is anything that can be done to mitigate this, but it is worth pointing out that the meteorological extremes are likely larger than shown (which shouldn't affect the main conclusions, but could potentially back up the results further).*

**Response:**

We will add a statement about the limitations of the ERA5 dataset in the Discussion section.

*L125: I think it is worth adding a citation for the VPD, as there are a number of ways to calculate (and is consistent with citing NIRv formula)*

**Response:**

Yes, we will add this in the revised version of the manuscript. .

*L127: should really say what resampling methodology. For example it is potentially OK to interpolate Tair, but more care should be made with precipitation and soil moisture (better just to take the conservative value). Probably the results would be more robust if sampling of SIF/NIRv were done to 0.1 instead, but I can understand preferring 0.05 for the forest type data.*

**Response:**

Yes exactly, we preferred 0.05° for the forest type data and resampled the Tair, RH, and SM data by interpolation. We will remove 'Precipitation' data from the manuscript as we did not use the dataset in the end.

*L132: some confusion on brackets open and closing. It would be better to simplify use of brackets.*

**Response:**

We will simplify the use of brackets.

*L145: Given the GOSIF dataset is being used, I think the citation should be done in the same way as the NIRv citation (i.e. using the dataset of Li et al. (2019) ). And we explain more about what the product is. See the rest of the specific comment about SIF*

Response:

As mentioned in our previous responses, we will provide detailed information about the SIF dataset used in the study and include an appropriate citation in the revised version.

*L146: SIF signals provide information about physiological response... whilst NIRv signals provide information about the health status of the canopy  
Addition of a citation supporting this would be beneficial. And perhaps a line or two about why SIF gives physiological response (i.e. what is SIF?)*

Response:

This point is addressed in response to previous comments.

*L154: I'm a bit surprised about the inclusion of EBF. There is not much of this in Europe – and you state it is <1%. As it is 7000km<sup>2</sup> and you have approximately 5x5km pixels I guess there are around 280 or so pixels in the dataset? Compared to the next smallest, ~3700? An order of magnitude bigger? It cannot really be distinguished on figure 1. The results for EBF in figures 7&8 are not significant... so why did you include it? The figure space used for EBF might be more interesting if it would be used for an 'all' forest-type category instead.*

Response:

Although EBF consists of a low number of pixels, this number was not so low to entirely excuse this forest type from the analysis.

*L161 'the selected five years were selected' → 'these five years were selected'*

Response:

Will be corrected.

*L161 'only pixels common across the selected five years were selected (Supplementary Fig. 1), and with more than 50% of the 0.05x0.05 pixel area identified as forests (Supplementary Fig. 1)'  
L162 The selected forested area in this study covered an area of 907'875 km<sup>2</sup> (about 24% of total land area of Europe) (Figure S1).'*

*'Supplementary Figure 1 Relationship between SIF and NIRv anomalies during 2003, 2018, and 2022 for different forest types.'*

*I'm slightly confused – Supplementary Figure 1 is SIF vs NIRv by forest type, no? Why is it being referenced here, and what is the relevance? Also there should be consistency in the referencing label (and it probably doesn't need referencing 3 times in two sentences).*

Response:

Here we were referring to Figure 1. We will correct this error.

*Figure 1: I would suggest changing one of the colors of DBF and WSA as it is not so clear which is which.*

Response.

We will change the colors in the revised version.

*Figure 1: Is there a reasoning for dividing the forest by NEU, CEU, MED? As far as I can tell this division is not referenced anywhere else in the paper, and all of the analysis is done Europe-wide (although a further breakdown of results by location could be interesting)*

Response:

Studies that focus on the forests across Europe often distinguish between different regions due to the distinct climate variability and species distributions. In our study we systematically divide the continent following Markonis et al. (2021) (see caption of Figure 1) and we break down our results by location for example in Lines 36-37, 165, 220, 313, 356.

*L182: 'we subset our meteorological (Precip, Tair, and VPD), soil moisture (SM)'*

*Is the Precipitation and Tair data used? As far as I can tell I only see VPD and SM meteo data being used. I understand the Tair is used in the calculation of VPD, along with the RH but then why include Tair here (and not the RH)? And is the Precipitation data used at all in the analysis? If not why is it mentioned?*

Response:

Precipitation was not used and Tair was used to estimate VPD. We will correct this statement and write: "For this purpose, we subset our meteorological (VPD), soil moisture (SM), and vegetation proxy (NIRv and GOSIF) datasets for the months of June, July, August (JJA) which comprised of fourteen 8-day periods, for each forested pixel between 2000 and 2022"

*190 'We calculated pixel-wise standardized summer anomalies'*

*Just to be clear for my own understanding – all anomalies shown in the paper are for the full JJA summer? So you take the overall JJA mean SIF, NIRv, VPD and SM and calculate the anomaly relative to the 22 year JJA mean? (as opposed to anomalies of the 14 8-day periods and then averaging the anomaly). For me, the division into 14 8-day periods for the climate data is confusing if we are only looking at JJA results – why is the 8-day division made (I understand that the SIF/NIRv is 8-day, so is it for consistency? In which case say so)? Also is the JJA mean the average of the 8-day periods, or is it done from the daily data?*

Response:

Yes, all anomalies of SM, VPD, NIRv, and GOSIF are a JJA summer mean. The hydrometeorological data (calculated) VPD and SM were of daily resolution, which was first resampled to 8-day mean VPD and SM to match the 8-day of NIRv/SIF, and then all variables



were ultimately converted to the summer JJA mean. We will clarify this in the revised version of the manuscript..

*L192: Z-scores less than -1 and more than 1 indicate significant negative and significant positive anomalies beyond normal variability.*

*See comment on using accurate statistical language*

Response:

We addressed this point in response to previous comments.

*L200 'and as normal areas if  $-1 < VPDz < 1$  &  $-1 < SMz < 1$ .'*

*see comment on stats. Say 'non-drought areas' or something else*

Response:

We decided no to use non-drought because in order to be consistent, we are using the same relative proxy for detecting extremes in the response variables too (in NIRv and GOSIF). Thus we decided to use the terms "normal" and "extreme".

*L220 'while in 2018 we observed the most widespread drought in northern Europe'*

*See specific comment about drought definitions. Here we see the largest and most widespread VPD and SM anomalies but it is tough to call it drought. Indeed it differs from research (<https://nhess.copernicus.org/articles/23/1921/2023/>) which suggests it was Central Europe that experienced the largest drought in 2018 (in terms of multiple metrics: soil wetness, precipitation, evaporation etc). Perhaps there should be some discussion on this and methodological differences.*

Response:

We will rewrite this statement and change it to: "In summer 2022, particularly southern regions of Europe experienced the most pronounced increase in atmospheric (z-score > 1) and soil dryness (z-score < -1) (Figure 2) while in 2018 we observed the most widespread VPD and SM anomalies in northern Europe."

We will also add a brief discussion on the different observed distributions of drought conditions and explain this with the methodological differences.

*Figure 3&4: Z-score, values from -1 and 1 are considered normal (within 1 standard deviation of the mean).*

*See statistical discussion*

*Shouldn't use the word 'normal' here as it has a specific statistical meaning. You could always say non-drought (assuming we are able to consider this drought – see specific comment), or 'within a single standard deviation fluctuation' or something*

Response:

We addressed this point in response to previous comments.

*Figure 4: We have 'GOSIF anomaly' but have not introduced what GOSIF is.*

Response:

We addressed this point in response to previous comments.

*L262 Figures 5&6*

*In the maps we see a lot of white color on the map, which doesn't seem to be in the scale (which has shades of blue and red). Is the white area not considered – and if so, can we have an explanation in the caption why? I guess it is because it is not a part of forest areas at 50%, in which case we should include this important information in the figure caption.*

*Separately, I assume these are JJA SIF/NIRv anomalies – in which case this information should also be added. Indeed, please add all information relevant to understanding the figure.*

Response:

The white areas represent non-forest regions and are therefore not considered in the analysis. In the revised version, we will change the color of non-forest areas to avoid confusion with the anomalies color map. Additionally, we will include all relevant information in the figure caption.

*L260: The ENFs however showed positive NIRv anomalies in 2022, also both in terms of magnitude and spatial coverage and % of total area affected (Figure 6).*

*If I've understood correctly, this should be expected I think. ENF is distributed in an area (Scandinavia) that has higher SM than the long-term mean (i.e. it is not really in a drought).*

Response:

We will clarify this in the text and discuss considering that these forests are distributed within an area with a higher SM anomalies.

*L271 The anomalies in NIRv and SIF were most correlated across WSAs (mean  $r^2 = 0.62$ )*

*I don't think it is statistically sound to take the mean value of  $R^2$  between different datasets. The  $R^2$  should be calculated by putting all the data together and calculated together. It's not something that can just be averaged between different groupings.*

Response:

We will correct this statement and instead report the maximum  $r = 0.73$  observed in 2018. Here  $r$  must be reported and not  $r^2$  (which we will correct as well).

*L271 The anomalies in NIRv and SIF were most correlated across WSAs (mean  $r^2 = 0.62$ )*

Also, previously we have been using the correlation coefficient ( $R$ ) and SF1 shows  $R$ , whereas now we are talking about  $R^2$ ? Is this intentional, because obviously these are quite different concepts.

#### Response

Yes,  $r$  will be reported. We will correct this typo.

Figure 7. See notes on figures

L272: 'With the increase in VPD positive anomalies (i.e., increased atmospheric dryness),... (Figure 7)' L275: With decrease in soil moisture (i.e., increased soil dryness),...

L281: 'Spatial regression between standardized SIF anomalies with (a) VPD and (b) SM over the drought areas'

So does the figure show SM & VPD anomalies or not? It's not clear, the figure needs introduction, explanation and a good caption. Then explain what results it shows.

#### Response:

This query was addressed in response to previous comments. We are showing absolute values here. We will correct the mismatch between the text and the figure to avoid confusion.

L276 : ' $r^2 = 34$ ' & ' $r^2 = 39$ ':

I assume this is meant to be 0.34 and 0.39 , right?

#### Response:

Yes. Will be corrected.

But where do the values come from? I don't see them in the figures and they seem to be a referencing the combined value for all the data? In case it is the latter, then I think it would be better to clearly state in a separate sentence where these values come from (i.e. For the full dataset combining all forest types  $R^2 = 0.34$ ). Given that it is referenced and compared multiple times (indeed more than the separated forest type figure), it might be useful to include a 'all forest types' plot in the figures.

#### Response:

Yes the values refer to the combined values for all the data. We will clarify this in the text and include a "all forest types" plot in the figures.

L278 (mean  $r^2 = 0.48$ ),

See previous comment – is just the mean value of the  $R^2$  of the different lines? If so then it's probably incorrect. You can't just average between different models to get a summary statistic of all the models – instead put all the data together and recalculate the  $R^2$ . I don't think the mean  $r^2$  between different fits really means anything as a statistical concept. Feel free to provide a mathematical explanation or literature citation to correct this however.

Response.

We will correct this as responded to the previous query.

*L279 'and responded most directly to changes in the soil moisture in the WSA'*

*I guess this backs up the idea that trees have deep roots and the first 7cm of soil is not so important for them. As the woody savanna contains sparse and lower level vegetation and fewer trees, the topsoil is going to have more of an impact (i.e. more grass & short rooted vegetation is going to contribute to the SIF/NIRv of the pixel). As the study is about drought in forests, it makes sense to use more than just the top layer of soil.*

Response:

We addressed this point in response to a previous query.

*L302 Figure 9. Temporal partial correlation coefficient of SIF with SM and VPD during summer for detected (a) drought areas and (b) normal areas.*

*Is it SIF and SM or is it SIF anomalies and SM anomalies. Over what time period are the anomalies calculated? What does the word temporal mean here, as previously we were looking at spatial correlations and data. What is the spatial range that this figure covers? See specific figure comments.*

Response:

The partial correlation coefficient is estimated using the 8-day GOSIF and SM values and not their anomalies. The word 'temporal' indicates that the correlation was across time (during the summer season of each 2003, 2018, and 2022 year) for each pixel, as correlations can also be across space (which is what is shown in Figure 8). Temporal correlation was calculated using the 14 8-day period GOSIF and SM/VPD data. We will clarify this in the revised version of the manuscript.

*L320 Although the atmospheric and soil drought were more extensive and severe (indicated by max observed z-score) in 2018 compared to 2022, the negative impact on forests, indicated by declined SIF, was larger in 2022 pointing to a decreased resilience of forests to drought since previous conditions in 2018.*

*I think that saying that the decline points to decreased resilience is a big stretch. We are comparing two very broad spatio-temporal averages of SIF change and two very broad spatio-temporal averages of air and soil dryness. There is a lot of complexity and patterns within this that the comparison of Europe-averaged SIF change is not able to capture. Sure, it might be because of a decline in resilience, but it also could be because of different areas covered by the drought, or different timespans of the drought, or the conditions in the year preceding the drought, or any number of aspects not considered.*

Response:

We will remove the statements regarding decreased resilience throughout the text (see our response to the previous query please).

*See specific comments.*

*L353 Our analysis showed that conditions in summer 2022 reduced vegetation functioning across DBFs the most, as it was indicated by declined SIF signals (Figure 5). While deciduous broad-leaved forests were most negatively affected by the extreme conditions in 2022, Evergreen Needle-Leaf Forests (ENF) distributed in northern regions of Europe showed enhanced canopy greening and SIF signals, through benefiting from the episodic warming.*

*See specific comment on the area of drought considered.*

*What is said in this section about differences in species adaptation to drought isn't wrong, it's just that the methodology and analysis of the paper is not necessarily demonstrating this. ENF also experienced a lower drought impact (indeed positive SM anomaly) – so why do we think the reason for the difference in the response is physiological?*

*Probably there needs to be some rewording to remove the implication that this analysis is demonstrating that the forests are responding differently due to their physiology (even if they do have a different physiology). Also there should be a discussion on the fact that the averaged forest response is different due to differences in the drought events happening at a given location (i.e. in some areas the drought is more or less extreme/persistent).*

Response:

We will reword this statement following your suggestion (see our response to a similar query before please).

*L375 Higher degree of canopy damage that we observed in 2022, despite less severe conditions compared to the previous extreme year, points towards a lasting impact on forest canopies—a sign of decreased forest resilience in the face of more frequent drought events.*

*This is a very strong conclusion to make from the analysis presented. There are a lot of complicated factors that are not being considered in the discussion.*

*See specific comment on legacy/resilience.*

Response:

As we responded to previous comments, we will remove the statements about resilience from the manuscript.

*L395 'Despite less severe overall conditions compared to previous extreme years, the observed higher degree of canopy damage in 2022 suggests a declining resilience of forests to drought,'*

As above.

Response:

The statements about resilience will be removed from the revised version of the manuscript.

## References

- Dogan, S., Berktaç, A., & Singh, V. P. (2012). Comparison of multi-monthly rainfall-based drought severity indices, with application to semi-arid Konya closed basin, Turkey. *Journal of Hydrology*, 470, 255-268.
- Jain, V. K., Pandey, R. P., Jain, M. K., & Byun, H. R. (2015). Comparison of drought indices for appraisal of drought characteristics in the Ken River Basin. *Weather and climate Extremes*, 8, 1-11.
- Lal P, Shekhar A, Gharun M, Das NN (2023) Spatiotemporal evolution of global long-term patterns of soil moisture. *Science of the Total Environment* 867, 161470
- Li, X., Xiao, J., Kimball, J.S., Reichle, R.H., Scott, R.L., Litvak, M.E., Bohrer, G., Frankenberg, C. (2020) Synergistic use of SMAP and OCO-2 data in assessing the responses of ecosystem productivity to the 2018 U.S. drought. *Remote Sensing of Environment*, 251, 112062. <https://doi.org/10.1016/j.rse.2020.112062>.
- Markonis, Y., Kumar, R., Hanel, M., Rakovec, O., Máca, P., AghaKouchak, A., (2021). The rise of compound warm-season droughts in Europe. *Science Advances* 7. <https://doi.org/10.1126/sciadv.abb9668>
- Mishra, A. K., & Singh, V. P. (2010). A review of drought concepts. *Journal of hydrology*, 391(1-2), 202-216.
- Tsakiris, G., & Vangelis, H. (2004). Towards a drought watch system based on spatial SPI. *Water resources management*, 18, 1-12.
- Wable, P. S., Jha, M. K., & Shekhar, A. (2019). Comparison of drought indices in a semi-arid river basin of India. *Water resources management*, 33, 75-102.
- Zhang J, Xiao J, Tong X, Zhang J, Meng P, Li J, Liu P, Yu P (2022) NIRv and SIF better estimate phenology than NDVI and EVI: Effects of spring and autumn phenology on ecosystem production of planted forests. *Agricultural and Forest Meteorology* 315, 108819
